# Supplementary material
Source: PubMed Central journal article supplement (PMC6290157)
Supplement: supp_RA118.005414_140185_2_supp_214379_pg36ny.pdf [file supp_RA118.005414_140185_2_supp_214379_pg36ny.pdf]

## SUPPLEMENTARY INFORMATION

Three structurally and functionally distinct  $\beta$ -glucuronidases from the human gut microbe *Bacteroides uniformis*

**Samuel J. Pellock,<sup>1,6</sup> William G. Walton,<sup>1,6</sup> Kristen A. Biernat,<sup>1</sup> Dariana Torres-Rivera,<sup>1</sup> Benjamin C. Creekmore,<sup>1</sup> Yongmei Xu,<sup>2</sup> Jian Liu,<sup>2</sup> Ashutosh Tripathy,<sup>3</sup> Lance J. Stewart,<sup>4</sup> and Matthew R. Redinbo<sup>1,3,5,\*</sup>**

From the <sup>1</sup>Department of Chemistry, University of North Carolina at Chapel Hill, Chapel Hill, NC 27599, USA; <sup>2</sup>Department of Chemical Biology and Medicinal Chemistry, University of North Carolina at Chapel Hill, NC 27599, USA; <sup>3</sup>Departments of Biochemistry and Biophysics, University of North Carolina at Chapel Hill, Chapel Hill, NC 27599, USA; <sup>4</sup>Institute for Protein Design, Department of Biochemistry, University of Washington, Seattle, WA 98195, USA; <sup>5</sup>Departments of Microbiology and Immunology, and Integrative Program for Biological and Genome Sciences, University of North Carolina at Chapel Hill; Chapel Hill, NC, 27599, USA; <sup>6</sup>These authors contributed equally

## TABLE OF CONTENTS

|                  |      |
|------------------|------|
| Figure S1 .....  | S-3  |
| Figure S2 .....  | S-4  |
| Figure S3 .....  | S-5  |
| Figure S4 .....  | S-6  |
| Figure S5 .....  | S-7  |
| Figure S6 .....  | S-8  |
| Figure S7 .....  | S-9  |
| Figure S8 .....  | S-10 |
| Figure S9 .....  | S-11 |
| Figure S10 ..... | S-12 |
| Figure S11 ..... | S-13 |
| Figure S12 ..... | S-14 |
| Figure S13 ..... | S-15 |
| Table S1 .....   | S-16 |
| Table S2 .....   | S-17 |
| Table S3 .....   | S-18 |
| Table S4 .....   | S-19 |
| Table S5 .....   | S-20 |

**N-term loop**

```

BuGUS1 ---MKTLKNSLI FLLMMPVLAFAQAQAPQIMVNSARQITSLDQWKTIVDFPENGCYD 56
BuGUS2 MEREKNTLPQKACHWAAVI-ISLFVL--PPV--HAQRQTQTINDSWKELKGECTA---- 51
BuGUS3 -----MKAPRILLSLL-FSLLLQAHAL--IPTDRKQRLTEHWEFIQQDMGS IWEV 48
           : : : : : : : : : : : : : : : : : :
N-term loop
BuGUS1 YRLKPYDGGCAQKTYSDKTKLQEYDFETDKLLFVPGDWNITQ--RPQLYYEGIVWYRK 113
BuGUS2 -----AA--DSA-----FDDSKWTS IHLPHWNITDAY--TEKDYYRGTGWR 90
BuGUS3 M--RPITGA---GKP-----ETVELWQKVLPHCRNEDAVIDDNYVQGGWYRT 94
           : : : : : : : : : : : : : : : : : :
BuGUS1 HFEYSIQ-PGRKLEIFNFAVNYEAIWNLGRKLRGHIGGETPENFEIINLK----- 164
BuGUS2 QLTLPGQWKEKQIILRLDAAGKSATIYINGKNVGEHAGGYTACS ENITFFLSF----- 143
BuGUS3 MLNIENPYINGRITCLEFEGAGQKTEVYVYTR IASHVGVGDENKADITEAVEAFRRTPLC 154
           : : * : : : : : : : : : * : : : : * : :
BuGUS1 ---EGTNSLVVWVWVTKRLEPAVPTVADWVNFQGITR FVTLIEEATYI RDVYVQLAK- 219
BuGUS2 ---DTPNLAUCVGNAR--QDIAPISGDFTF FGGIYRDWLVIAVNGHFNLNHSQDGL 197
BuGUS3 RERFGGKIPIAIRCINSRDTEMI PSDMSDFNLVGGLYRYVNLVYPAVHFQRIEAIT- 213
           : : * : : : : : : : : : * : : : : * : :
BuGUS1 -----DKNMIEGWOLEGSKEQKIITL-----DIPELKV---KKEV-----TT 255
BuGUS2 FISTPQUSEEQAILSIRGEV-KNDAPEGATLELIHTIYRPDGLLQILKNIQLAGET 256
BuGUS3 -----DEKQQGSISIDIAFGLGSGKEKEKEKEKE KEFSLRVFSPEKEVNS ISSEL-----T 261
           : : : : : : : : : : * : : : : * : :
BuGUS1 DANGYASFLIKSKEILWTPFNKLYAVNLASET-----DKVSDEIGRIRIRTEGI-KI 307
BuGUS2 AFSNEA--TPVLKPELWTPETPRLRYVETLRLNRKTKILLDQSNHYAFRWFRFDGEGF 314
BuGUS3 EISSYQ--ISLRPQLWSPHSPALYTCVAELIDNGDTL---RITQHFGRHRFEEKGPF 316
           : : : * * : * : * * : : : : : * : * : :
BuGUS1 LLNKEIFCRGISIHEETPYVSGRAYSKDHAHTLLSWAKELGQNFVRLAHYHNEEMRE 367
BuGUS2 FLNGKPYKLRGICRHQDQKP-IGPALTDEMRRDFLMKEMGANFIRISHYPQDALLEM 373
BuGUS3 YLNGERLLRGTHRHEDHAG-VGAALTEEMRTEMQQIKEMGANFIRLGHVQQSGIILRL 375
           * : : * : : * : : : : : : : : * : * : * : * :
BuGUS1 AERMGFLWSEIFWTIHWENDTYQNAEQLCDMIARDKNRCMILWSIANETPHSKT 427
BuGUS2 CDKLGMAWEEIPIIDIVP-NTPGYGDNCERNLREMIRQHNHPSIITWGYNNEILMVTQ 432
BuGUS3 CDELGLLWEEIFWCGGL-GESYNQARRLINMIRQHRNHPSVILLWGLNENDWPGD 434
           : : : * : * : * : : : * : * : * : * : *
           L2
           mL2

```

**Figure S1. Multiple sequence alignment of *BuGUS-1*, *BuGUS-2*, and *BuGUS-3*.** Regions of interest discussed in the text are bolded and highlighted in various colors. Unique active site residues highlighted in yellow, N-terminal loop and catalytic glutamates in red, NxK motif in green, Loop 2 (L2) in magenta, mini-loop 2 (mL2) in blue.

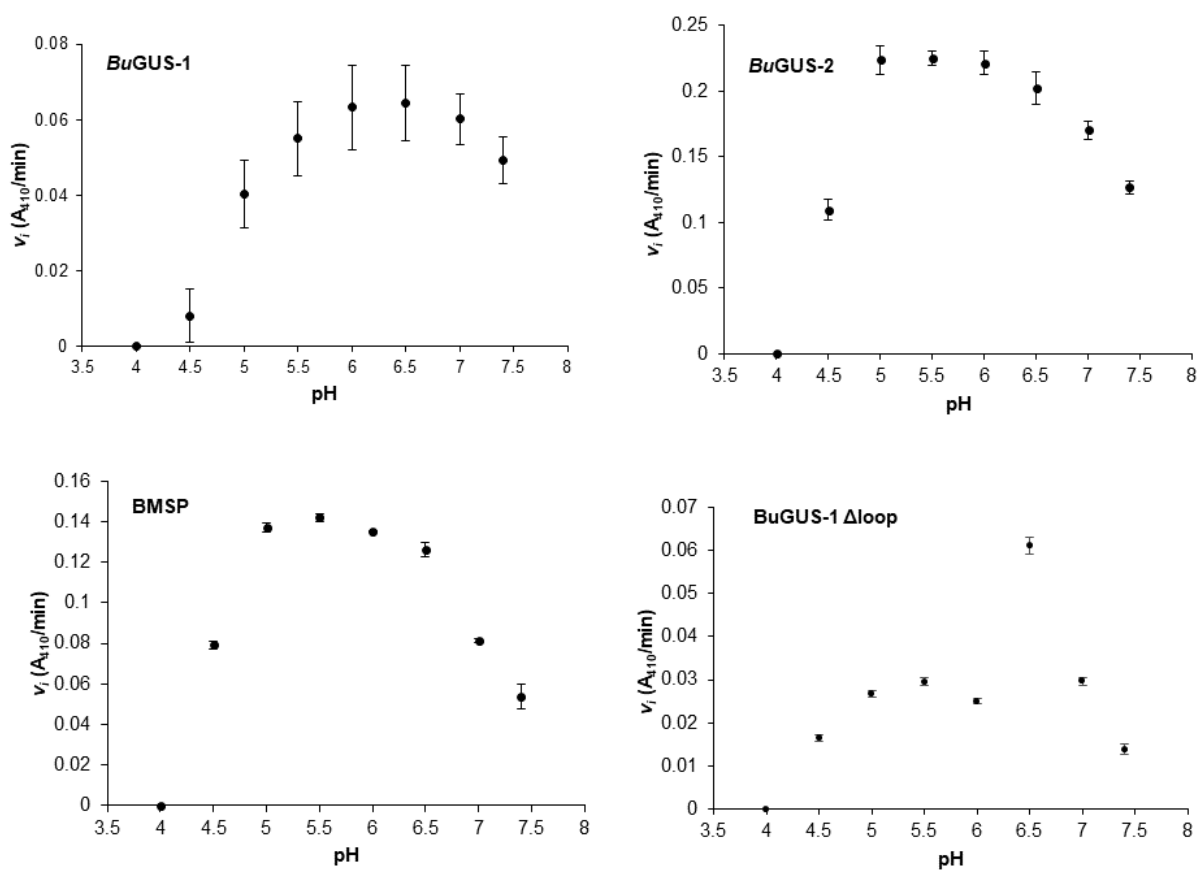

**Figure S2.** pH screen of PNPG hydrolysis for *BuGUS-1*, *BuGUS-2*, and *BuGUS-3*. Error bars represent SD of  $n = 3$  biological replicates.

*BuGUS-1*  
*BuGUS-2* (5UJ6)  
*BuGUS-3*  
*EcGUS* (3LPF)

rmsd = 3.7 Å  
over 520 Ca

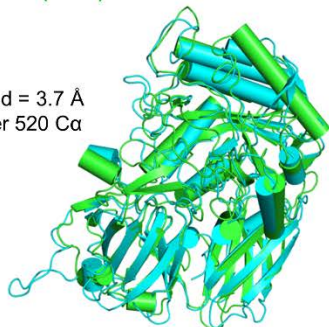

rmsd = 3.6 Å  
over 528 Ca

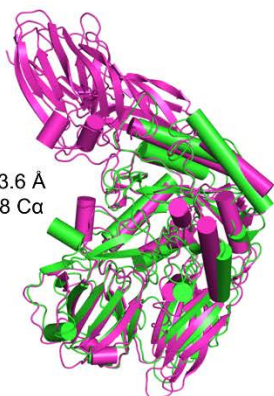

rmsd = 3.8 Å  
over 520 Ca

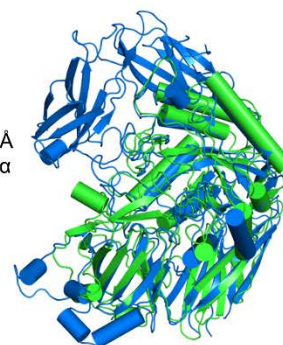

**Figure S3. Structural alignments of *BuGUS-1* (cyan), *BuGUS-2* (magenta), and *BuGUS-3* (blue) with previously elucidated structure of *E. coli* GUS (green, *EcGUS*, PDB: 3LPF).**

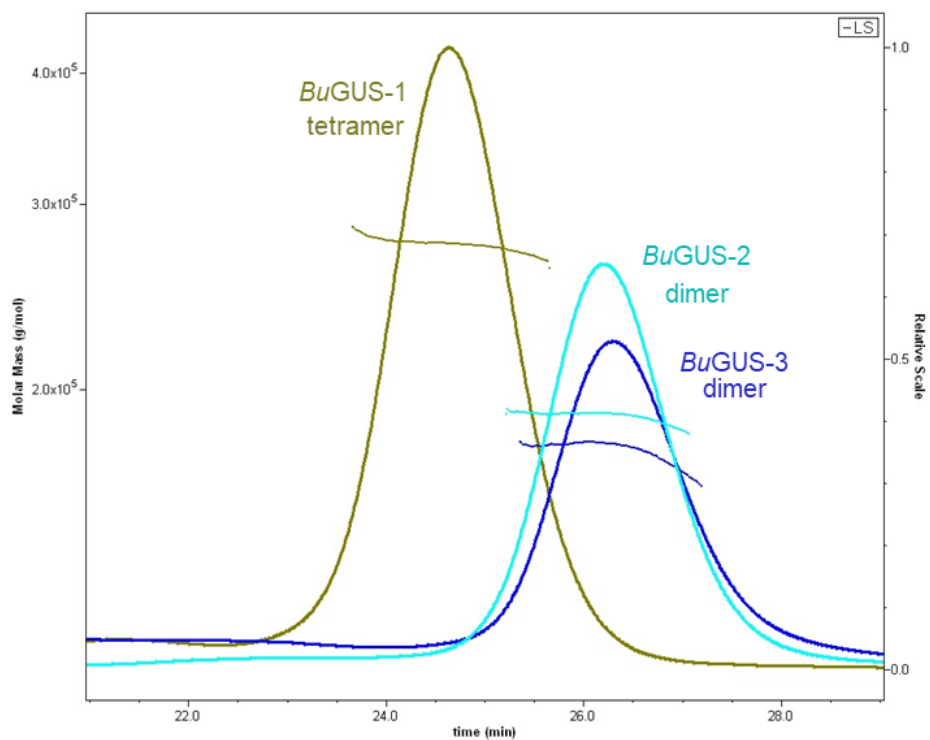

**Figure S4.** Size-exclusion chromatography multi-angle light scattering analysis (SEC-MALS) of *BuGUS-1*, *BuGUS-2*, and *BuGUS-3* confirms oligomeric states predicted from crystal structures.

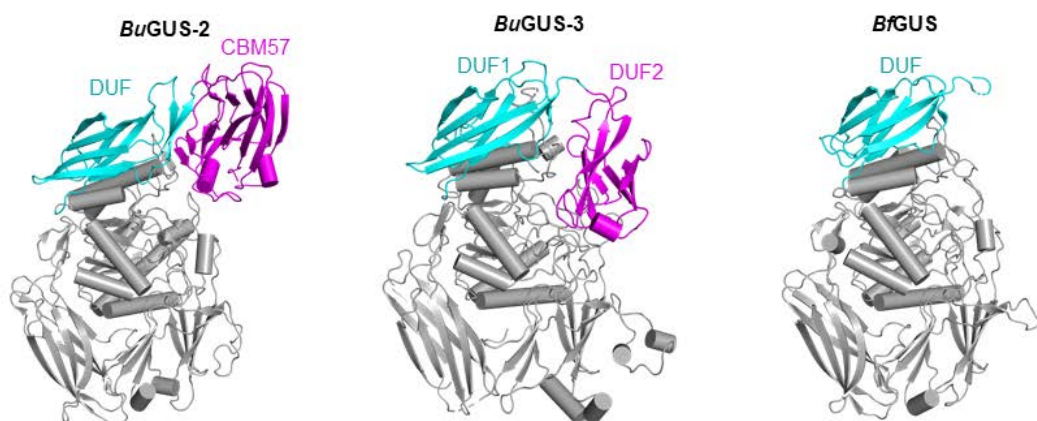

**Figure S5. Comparison of CBMs of *BuGUS-2*, *BuGUS-3*, and *BfGUS*.** Conserved core fold of GUS shown in grey with DUF-1 and CBM 57 or DUF2 (for *BuGUS-2* and *BuGUS-3*) highlighted in cyan and magenta, respectively.

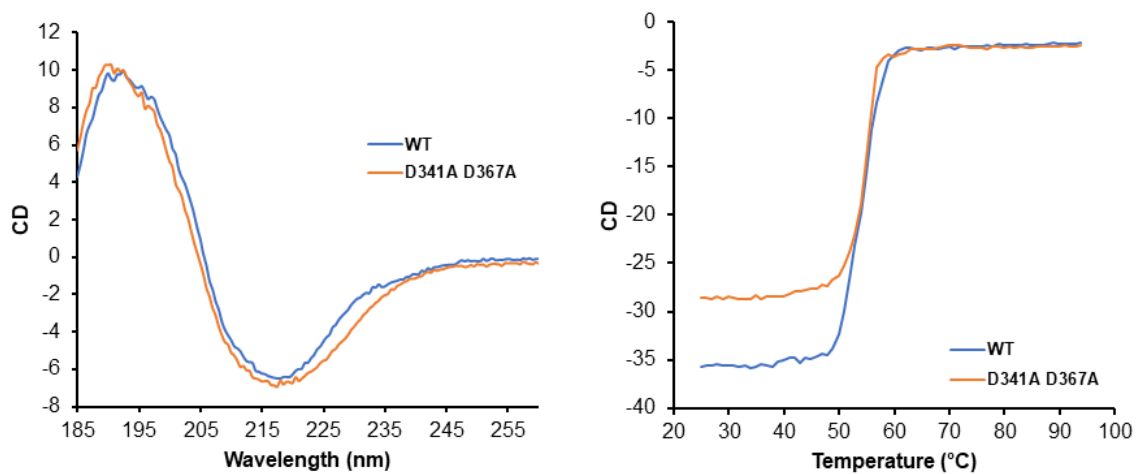

**Figure S6. Circular dichroism wavelength scan and melting temperature for WT and D341A D367A calcium binding mutant of *BuGUS-2*.**



|                       |                                                                                                                                  |     |
|-----------------------|----------------------------------------------------------------------------------------------------------------------------------|-----|
| SRS013476.24854-T1-C  | EGGFAAFKFDITDLVKPE-----SENVIIVKVNNAPTYIAPITNQGGDFTKMGGIYRD                                                                       | 167 |
| SRS018575.34501-T1-C  | IGGYTFCCFDITPYIREG-----ENQLVVCVDNSYDSEIPLS--ADFTFFGGIYRD                                                                         | 165 |
| SRS016203.125956-T1-C | KGGYSAFTFDVTDYVHTG-----RNLVAVSVDNSYNPDIAFLS--ADFTFFGGIYRD                                                                        | 173 |
| SRS012902.13258-T1-C  | KGGYSAFTFDVTDYVHAG-----RNLIAVSVDNSHNPDIAPLS--ADFTFFGGIYRD                                                                        | 173 |
| SRS015217.11766-T1-C  | KGGYTRFCFDITSHLRYG-----QENLFAIYVNNVYNPNIPLS--ADFTFFGGIYRD                                                                        | 203 |
| SRS050422.73127-T1-C  | KGGYTRFCFDITSKLRYG-----QENLFAICVNNTYNPNIPLS--ADFTFFGGIYRD                                                                        | 168 |
| SRS048870.28850-T1-C  | KGGYSAFIVDITDKVRND-----VSNLLMVHVNNQ--NNQIPLS--GDFTFGGIYRD                                                                        | 166 |
| SRS020869.18805-T1-C  | TGGYACTFLDITPFCSLN-----TPNSLAVCVDNS-RQDIPLS--GDFTFGGIYRD                                                                         | 176 |
| SRS045713.76924-T1-C  | NGGYTACTFDITPFCFD-----APNSLAIHVDNA-RQDIPLS--ADFTFFGGIYRD                                                                         | 173 |
| SRS015190.42469-T1-C  | NGGYTACTFDITSLCFEN-----SPNSLAIHVDNA-RQDIPLS--ADFTFFGGIYRD                                                                        | 156 |
| SRS056259.118375-T1-C | NGGYTACTFDITSLCFEN-----SPNSLAIHVDNA-RQDIPLS--ADFTFFGGIYRD                                                                        | 156 |
| SRS011405.14712-T1-C  | AGGYSAFILDVTGLIR-----ENNEIEITVDNA-RRDITPLW--ADFTFWGGIYRD                                                                         | 163 |
| SRS019787.27227-T1-C  | AGGYSAFILDVTGLIR-----KENEIEIIVDNA-RRDITPLW--ADFTFWGGIYRD                                                                         | 163 |
| SRS049959.38447-T1-C  | AGGYSSTFFDITDFLNTNPARQGEKSENTIEITVDNS-RPDVTPIM--ADFTFWGGIYRD                                                                     | 164 |
| SRS011529.64867-T1-C  | AGGYSSTFFDITPYLQ-----KNNTIEITVDNS-RKDIPLS--ADFTFWGGIYRD                                                                          | 158 |
| SRS017433.24596-T1-C  | LGGYSAFLLDITDLR-----KENVIEITVDNS-RRDITPLW--ADFTFWGGIYRD                                                                          | 159 |
| SRS019601.88766-T1-C  | VGGYTACIVDITEYIR-----KENLIEITVDNG-RKDIPLS--ADFTFWGGIYRD                                                                          | 142 |
|                       | **:: .:* * * . : * : * : * : . : * * * * * : * * *                                                                               |     |
|                       | ⋮                                                                                                                                |     |
| SRS013476.24854-T1-C  | EVTQHFGVRSYSIDYDSGFYLNGRSYDLHGVDYHQDSYENGWAMSDSQRE <sup>R</sup> DYGMMDMG                                                         | 345 |
| SRS018575.34501-T1-C  | EVSNTFGIRTCFSAEKGFEKAVKLLGTNRHQCHSGMGNALKDEMHR <sup>R</sup> DI ELLHEMG                                                           | 342 |
| SRS016203.125956-T1-C | CVVNPGLGIREYHFAEKGFFLNKGRKLI <sup>R</sup> GTSRHQDYKGMGNALRDEMHI <sup>R</sup> DIQLSKDMG                                           | 351 |
| SRS012902.13258-T1-C  | CVVNPGLGIREYHFAEKGFFLNKGRKLI <sup>R</sup> GTSRHQDYKGMGNALRDEMHI <sup>R</sup> DIQVLSKDMG                                          | 351 |
| SRS015217.11766-T1-C  | EVVNPGLRWFKFDSEKGFPLNGKWRKLI <sup>R</sup> GARHQDYFQKGNALRDELHI <sup>R</sup> QVLLKEMG                                             | 382 |
| SRS050422.73127-T1-C  | EVVNPGLRWFKFDSEKGFPLNGKWRKLI <sup>R</sup> GARHQDYFQKGNALRDELHV <sup>R</sup> QVLLKEMG                                             | 347 |
| SRS048870.28850-T1-C  | EMRVPLGVRWFSDAQEGFKLNGKPKLI <sup>R</sup> GACRHQDQMPMGIALSDEMHR <sup>R</sup> DMQLKDMG                                             | 344 |
| SRS020869.18805-T1-C  | QSNHYTGFRWFSFDGERGKFLNGKPKY <sup>R</sup> KLRGICRHQDQKPIGVALTDEMHR <sup>R</sup> DIKLMKEMG                                         | 355 |
| SRS045713.76924-T1-C  | HSNHHTGFRWFSFDGKGFSLNGKPKY <sup>R</sup> KLRGICRHQDQKPIGVALTDEMHR <sup>R</sup> DMKLMKEMG                                          | 352 |
| SRS015190.42469-T1-C  | RSNHHTGFRWFGFDGKGFSLNGKPKY <sup>R</sup> KLRGICRHQDQKPIGVALTDEMHR <sup>R</sup> DMMLKEMG                                           | 335 |
| SRS056259.118375-T1-C | RSNHHTGFRWFGFDGKGFSLNGKPKY <sup>R</sup> KLRGICRHQDQKPIGVALTDEMHR <sup>R</sup> DMMLKEMG                                           | 335 |
| SRS011405.14712-T1-C  | EISNKIGFRWFSFDADKGFSLNGKPKY <sup>R</sup> KLRGVNRHQDQAPVGVADDEVNR <sup>R</sup> DIRQIKEIG                                          | 342 |
| SRS019787.27227-T1-C  | EVSNKVGRWFSFDGKGFSLNGKPKY <sup>R</sup> KLRGVNRHQDQAPVGVADDEVNR <sup>R</sup> DIRQKKEIG                                            | 342 |
| SRS049959.38447-T1-C  | EKNHKVGRWFSFDGKGFSLNGKPKY <sup>R</sup> KLRGVNRHQDQAPVGVADDEAHR <sup>R</sup> DIKLMKELG                                            | 343 |
| SRS011529.64867-T1-C  | RSTHKTGFRWFSFDGKGFSLNGKPKY <sup>R</sup> KLRGVNRHQDQAPVGVADDEAHR <sup>R</sup> DIRLKEMG                                            | 336 |
| SRS017433.24596-T1-C  | EQIHKTGFRWFSFDGKGFSLNGKPKY <sup>R</sup> KLRGVNRHQDQAPVGVADDEAHR <sup>R</sup> DIRLMKELG                                           | 338 |
| SRS019601.88766-T1-C  | EKNHKVGRWFSFDGSGKGFPLNGKSY <sup>R</sup> KLRGLNRHQDQAPAGVALDDEAHR <sup>R</sup> DI FLMKELG                                         | 321 |
|                       | * . * . : . * * * * * : * * * * * * * : * * : * . : * : * * * * * : * * *                                                        |     |
|                       | ⋮                                                                                                                                |     |
| SRS013476.24854-T1-C  | CTAVRLAHYQH <sup>R</sup> DQY EYDLCDRLGLCVWTEVGLVNTISADNDTLIIADGFAGNIRQQLTEL                                                      | 405 |
| SRS018575.34501-T1-C  | GNFLRIAHYP <sup>R</sup> DEMVLAAACNRLGI <sup>R</sup> VT <sup>R</sup> SVEI <sup>R</sup> PVNAITM-----NQNFSDNCVEMMKEM                | 395 |
| SRS016203.125956-T1-C | SNFLRVAHYP <sup>R</sup> DPVVMQCDKLG <sup>R</sup> LLTSVEI <sup>R</sup> PVNAITQ-----SRAFMDCNVEQATEM                                | 404 |
| SRS012902.13258-T1-C  | SNFLRVAHYP <sup>R</sup> DPVVMQCDKLG <sup>R</sup> LLTSVEI <sup>R</sup> PVNAITQ-----SKAFMDCNVEQATEM                                | 404 |
| SRS015217.11766-T1-C  | GNFLRVSHYP <sup>R</sup> DPVIMEMCDKLG <sup>R</sup> I <sup>R</sup> VT <sup>R</sup> SVEI <sup>R</sup> PVNAVTE-----TEEFLQNSVEMAKEM   | 435 |
| SRS050422.73127-T1-C  | GNFLRVSHYP <sup>R</sup> DPVIMEMCDKLG <sup>R</sup> I <sup>R</sup> VT <sup>R</sup> SVEI <sup>R</sup> PVNAVTE-----TEEFLTNSVEMAKEM   | 400 |
| SRS048870.28850-T1-C  | ANFVRLAHYP <sup>R</sup> DDAVLRACDELGLMVWEEI <sup>R</sup> PVVDLIAL-----GDEFRTNATSALREM                                            | 397 |
| SRS020869.18805-T1-C  | ANFIRISHYP <sup>R</sup> DDALLEMCCKLGLM <sup>R</sup> LAWEEI <sup>R</sup> PI <sup>R</sup> IDI <sup>R</sup> VPD-----TPGYTENCERNLREM | 408 |
| SRS045713.76924-T1-C  | ANFIRISHYP <sup>R</sup> DDALLEMCCKLGLM <sup>R</sup> LAWEEI <sup>R</sup> PI <sup>R</sup> IDI <sup>R</sup> VPD-----TPGYAENCENLREM  | 405 |
| SRS015190.42469-T1-C  | ANFIRISHYP <sup>R</sup> DDALLEMCCKLGLM <sup>R</sup> LAWEEI <sup>R</sup> PI <sup>R</sup> IDI <sup>R</sup> VPD-----TPGYAENCENLREM  | 388 |
| SRS056259.118375-T1-C | ANFIRISHYP <sup>R</sup> DDALLEMCCKLGLM <sup>R</sup> LAWEEI <sup>R</sup> PI <sup>R</sup> IDI <sup>R</sup> VPD-----TPGYAENCENLREM  | 388 |
| SRS011405.14712-T1-C  | CNFIRISHYP <sup>R</sup> DDALLDACDELGLL <sup>R</sup> LAWEEI <sup>R</sup> PI <sup>R</sup> IDI <sup>R</sup> VPD-----TPGYDDHCENMLVEM | 395 |
| SRS019787.27227-T1-C  | CNFIRISHYP <sup>R</sup> DDALLDACDELGLL <sup>R</sup> LAWEEI <sup>R</sup> PI <sup>R</sup> INMVPD-----TPGYEDNCETNLVEM               | 395 |
| SRS049959.38447-T1-C  | CNFIRISHYP <sup>R</sup> DDALLDACDELGLL <sup>R</sup> LAWEEI <sup>R</sup> PI <sup>R</sup> IDLVPD-----TPHYADNCERNLREM               | 396 |
| SRS011529.64867-T1-C  | CNFIRIAHYP <sup>R</sup> DDALVEACDEMGLL <sup>R</sup> LAWEEI <sup>R</sup> PI <sup>R</sup> INIVPD-----TPGYDDNCETNLTEM               | 389 |
| SRS017433.24596-T1-C  | CNFIRISHYP <sup>R</sup> DDALLEMCDELGLL <sup>R</sup> VWEEI <sup>R</sup> PI <sup>R</sup> INIVPD-----TPGYDDNCEYNLREM                | 391 |
| SRS019601.88766-T1-C  | CNFIRISHYP <sup>R</sup> DDALLEMCDELGLL <sup>R</sup> LAWEEI <sup>R</sup> PI <sup>R</sup> INIVPN-----TPGYDDNCEYNLREM               | 374 |
|                       | . : * * * * * : * * * * * * * : * * * * * : * * * * * : * * *                                                                    |     |

**Figure S7. Sequence alignment of putative calcium binding GUS enzymes from the Human Microbiome Project stool sample database. Related to Figure 5.**

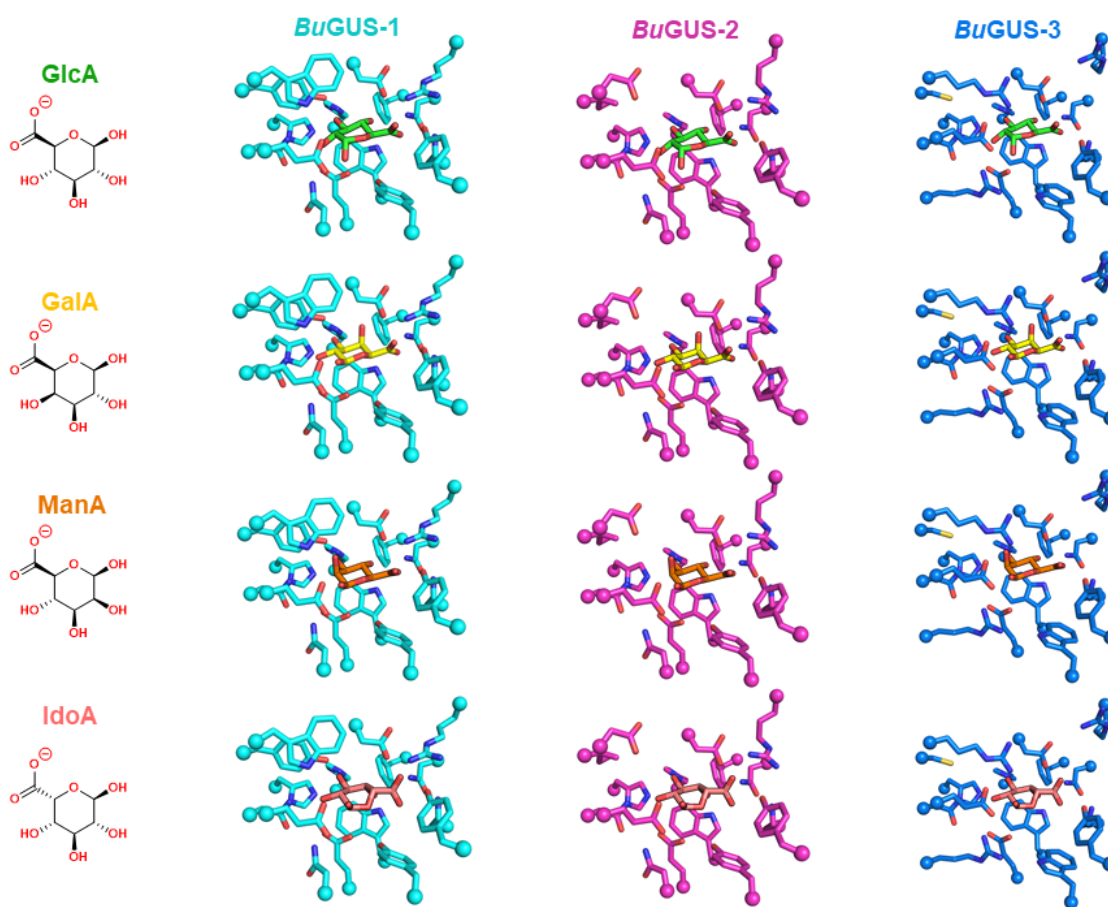

**Figure S8. Modeling of sugar monosaccharides of glucuronate (GlcA), galacturonate (GalA), mannuronate (ManA), and iduronate (IdoA) in the active sites of *BuGUS-1*, *BuGUS-2*, and *BuGUS-3*. Related to Figure 6.**

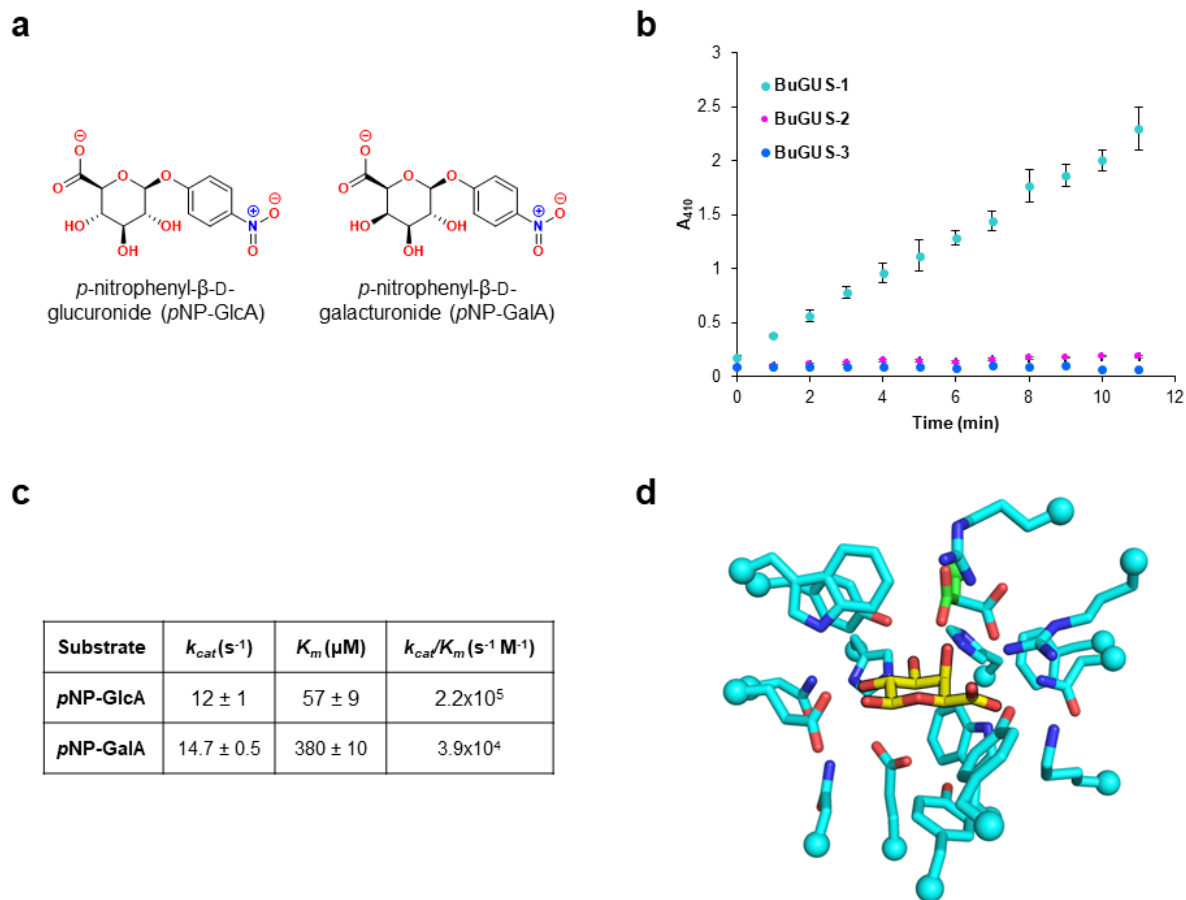

**Figure S9. *BuGUS-1*, but not *BuGUS-2* or *BuGUS-3*, can process both glucuronides and galacturonides. Related to Table 1.** *a*, chemical structures of *p*NP-GlcA and *p*NP-GalA. *b*, progress curves for *BuGUS-1*, *BuGUS-2*, and *BuGUS-3* with *p*NP-GalA. *c*, kinetic parameters of *p*NP-GlcA and *p*NP-GalA hydrolysis by *BuGUS-1*. *d*, active site of *BuGUS-1* with GalA manually docked and potentially important aspartic acid residue highlighted in green. This aspartic acid likely undergoes a rotamer shift, shown in cyan, to accommodate the GalA sugar.

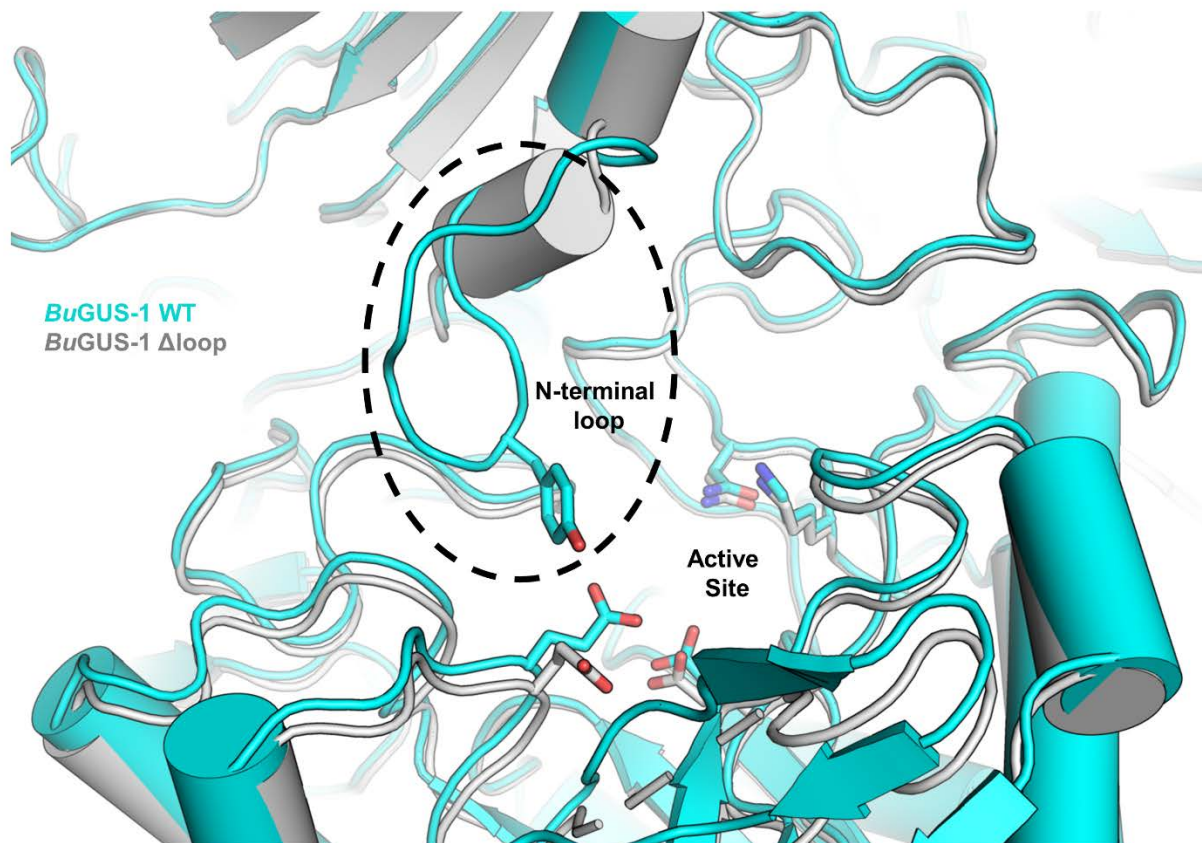

**Figure S10.** Structural overlay of *BuGUS-1* WT (cyan) and *BuGUS-1*  $\Delta$ loop (grey) reveals absence of N-terminal loop necessary for efficient processing of SN-38-G. Related to Figure 8.

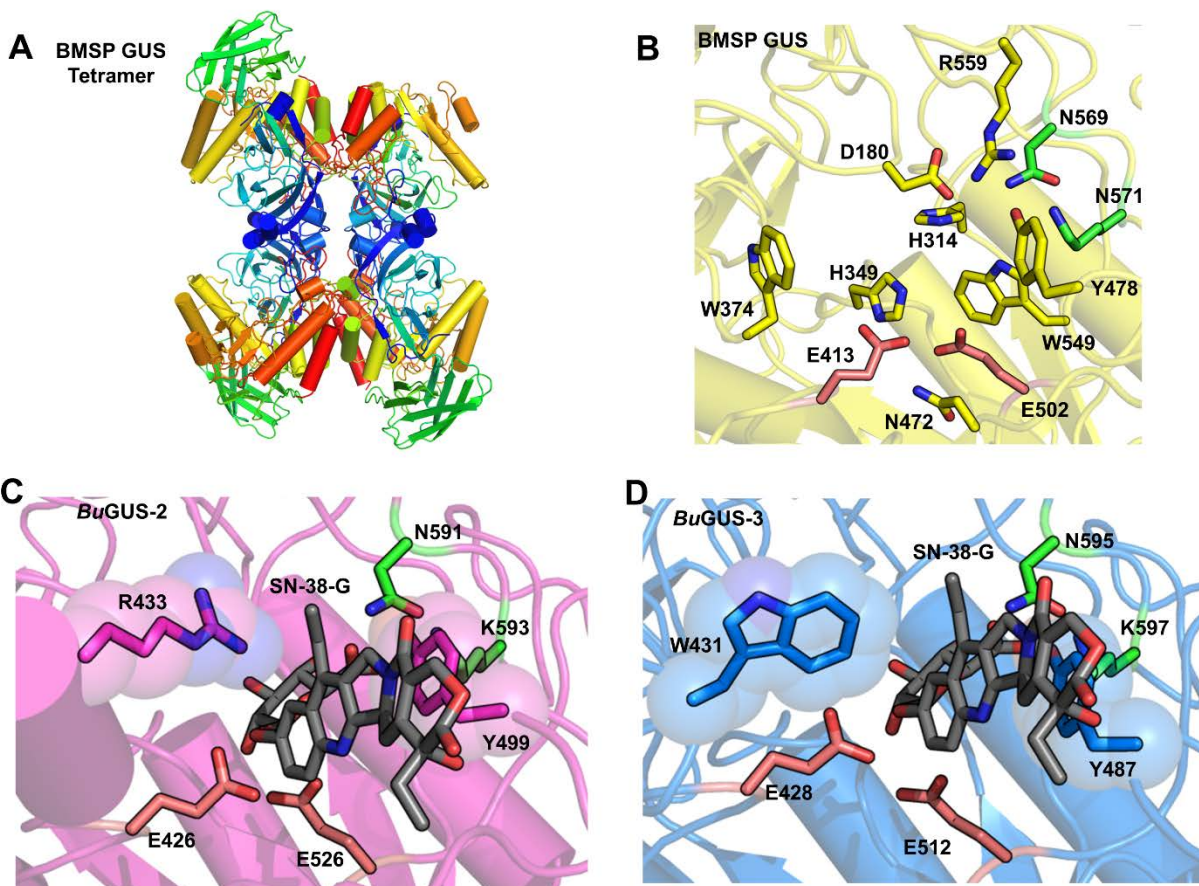

Supplementary Figure 11.

**Figure S11. Structural analysis of BMSP GUS and docking studies of SN-38-G in the active sites of *BuGUS-2* and *BuGUS-3*.** Related to Figure 1, Figure 6. *a*, tetrameric biological assembly of BMSP GUS. *b*, active site of BMSP GUS with NxK motif in green and catalytic glutamates in deep salmon. Manually docked SN-38-G in active site of *c*, *BuGUS-2* and *d*, *BuGUS-3* based on the PTG-bound structure of *BuGUS-1*.

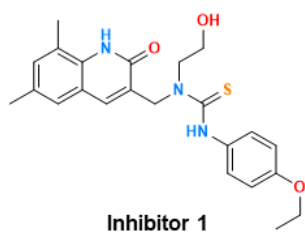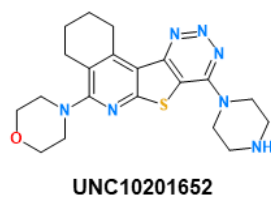

**Figure S12. Chemical structures of Inhibitor 1 and UNC10201652. Related to Table 3.**

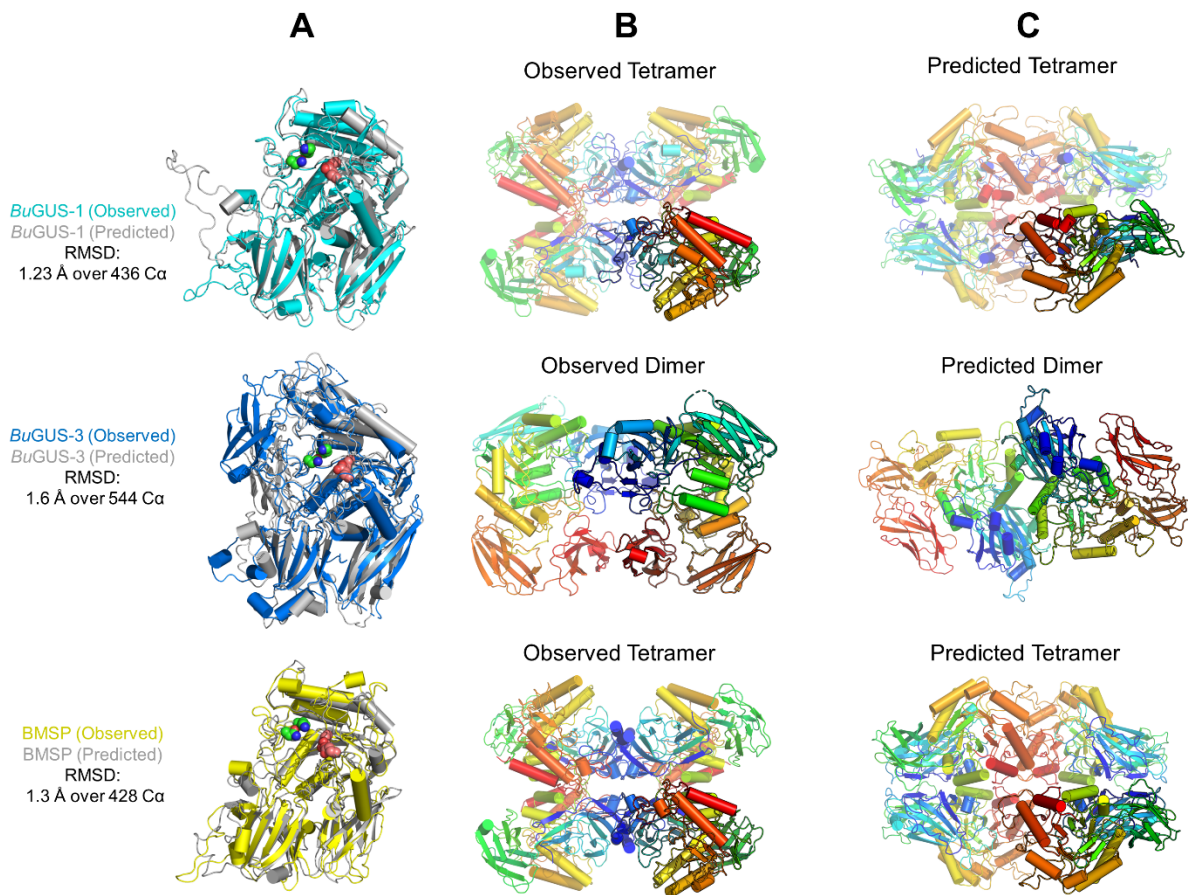

**Figure S13. Predicted structures by Rosetta-based modeling of unique tertiary and quaternary structures discovered by crystallography.** (A) Overlay of observed and Rosetta-predicted tertiary structure for *BuGUS-1*, *BuGUS-3*, and *BMSP* GUS. (B) Observed quaternary structures for *BuGUS-1*, *BuGUS-3*, and *BMSP*. (C) Rosetta prediction of quaternary structure for *BuGUS-1*, *BuGUS-3*, and *BMSP*.

| Protein                                                      | BuGUS-1                             | BuGUS-3                              | BMSP                               | BuGUS-1 + G-1,5-L                    | BuGUS-2 + G-1,5-L                             | BuGUS-1 + GlcA                       | BuGUS-1 $\Delta$ loop             | BuGUS-2 $\Delta$ Ca <sup>2+</sup>             | BuGUS-1 + TPG                      |
|--------------------------------------------------------------|-------------------------------------|--------------------------------------|------------------------------------|--------------------------------------|-----------------------------------------------|--------------------------------------|-----------------------------------|-----------------------------------------------|------------------------------------|
| Resolution (Å)                                               | 29.6 – 2.20                         | 29.48 – 2.35                         | 29.43 – 2.65                       | 29.93-1.90                           | 29.48-2.50                                    | 29.98-1.80                           | 29.34-2.00                        | 29.55-3.00                                    | 29.30-2.40                         |
| Resolution in highest shell (Å)                              | 2.25 – 2.20                         | 2.39 – 2.35                          | 2.71 – 2.65                        | 1.93 -1.90                           | 2.56-2.50                                     | 1.83-1.80                            | 2.03-2.00                         | 3.12-3.00                                     | 2.49-2.40                          |
| Space group                                                  | C2                                  | C2                                   | I4 <sub>1</sub>                    | C2                                   | P2 <sub>1</sub> 2 <sub>1</sub> 2 <sub>1</sub> | C2                                   | P12 <sub>1</sub> 1                | P2 <sub>1</sub> 2 <sub>1</sub> 2 <sub>1</sub> | P3 <sub>2</sub> 2 <sub>1</sub>     |
| Unit cell dimensions a,b,c (Å);<br>$\alpha,\beta,\gamma$ (°) | 125.8,130.2, 94.2;<br>90, 100.3, 90 | 209.7, 68.2, 167.4;<br>90, 122.5, 90 | 213.5, 213.5, 112.6;<br>90, 90, 90 | 126.1, 130.2, 94.5;<br>90, 100.2, 90 | 74.5, 141.9, 180.8;<br>90, 90, 90             | 134.2, 133.9, 163.4;<br>90,100.3, 90 | 76.7,199.2, 84.6;<br>90,102.8, 90 | 75.0,142.0, 181.2;<br>90, 90, 90              | 252.2, 252.2, 107.3<br>90, 90, 120 |
| Total reflections (F>0)                                      | 517245                              | 568681                               | 305377                             | 797212                               | 446802                                        | 1761568                              | 995295                            | 525999                                        | 3085366                            |
| Unique reflections                                           | 75592                               | 83443                                | 73245                              | 114979                               | 67106                                         | 261960                               | 163378                            | 39506                                         | 152030                             |
| Multiplicity                                                 | 6.8 (7.0)                           | 6.8 (6.9)                            | 4.2 (4.2)                          | 6.9 (6.9)                            | 6.7 (6.8)                                     | 6.7 (6.9)                            | 6.1 (5.8)                         | 13.3 (14.0)                                   | 20.3 (21.0)                        |
| Completeness, %(highest shell)                               | 99.9 (100)                          | 99.9 (99.9)                          | 99.7 (100)                         | 97.7 (96.3)                          | 99.9 (100.0)                                  | 100 (100)                            | 98.4 (97.7)                       | 99.8 (100)                                    | 99.8 (99.7)                        |
| Mean I/sigma (I) (highest shell)                             | 18.6 (4.7)                          | 21.0 (4.9)                           | 16.1 (2.6)                         | 16.6 (4.4)                           | 15.9 (4.1)                                    | 11.8 (4.3)                           | 12.1 (3.7)                        | 20.9 (3.9)                                    | 23.4 (7.0)                         |
| Wilson B-factor (Å <sup>2</sup> )                            | 21.4                                | 31.9                                 | 61.8                               | 14.9                                 | 36.5                                          | 8.3                                  | 25.6                              | 67.7                                          | 33.1                               |
| R <sub>merge</sub> (highest shell)                           | 0.078 (0.387)                       | 0.073 (0.445)                        | 0.060 (0.50)                       | 0.081 (0.351)                        | 0.084 (0.438)                                 | 0.126 (0.471)                        | 0.118 (0.496)                     | 0.120 (0.69)                                  | 0.111 (0.511)                      |
| R <sub>work</sub>                                            | 0.1494                              | 0.1755                               | 0.2069                             | 0.1377                               | 0.1703                                        | 0.18                                 | 0.176                             | 0.1670                                        | 0.1739                             |
| R <sub>free</sub>                                            | 0.1841                              | 0.2224                               | 0.2827                             | 0.1694                               | 0.2277                                        | 0.229                                | 0.23                              | 0.2409                                        | 0.2467                             |
| Number of molecules in asymmetric unit                       | 2                                   | 2                                    | 4                                  | 2                                    | 2                                             | 4                                    | 4                                 | 2                                             | 6                                  |
| Number of water molecules in asymmetric unit                 | 1075                                | 815                                  | 110                                | 1549                                 | 535                                           | 4087                                 | 1808                              | 0                                             | 1561                               |
| rms bonds (Å)                                                | 0.003                               | 0.009                                | 0.008                              | 0.012                                | 0.004                                         | 0.006                                | 0.007                             | 0.009                                         | 0.007                              |
| rms angles (°)                                               | 0.631                               | 1.24                                 | 1.000                              | 1.072                                | 0.669                                         | 0.874                                | 0.849                             | 1.030                                         | 0.94                               |
| Ramachandran favored (%)                                     | 96.53                               | 95.34                                | 92.85                              | 96.79                                | 96.23                                         | 96.71                                | 96.30                             | 92.91                                         | 92.23                              |
| Ramachandran outliers (%)                                    | 0.00                                | 0.39                                 | 0.19                               | 0.00                                 | 0.24                                          | 0.00                                 | 0.09                              | 0.18                                          | 0.20                               |
| Clash score                                                  | 3.04                                | 6.87                                 | 13                                 | 1.96                                 | 2.12                                          | 7.05                                 | 5                                 | 8.33                                          | 16.84                              |
| Average B-factor (Å <sup>2</sup> )                           | 28.3                                | 35.1                                 | 67.0                               | 21.2                                 | 41.0                                          | 14.6                                 | 30.0                              | 57.9                                          | 37.9                               |
| RCSB ID                                                      | 6D1N                                | 6D1P                                 | 6D8K                               | 6D41                                 | 6D5O                                          | 6D6W                                 | 6D89                              | 6D8G                                          | 6D7F                               |

**Table S1. X-ray data collection and refinement statistics.**



| HMGC ID          | Length | Kingdom  | Phylum        | Class       | Order          | Family         | Genus          | Species      | NCBI ID        |
|------------------|--------|----------|---------------|-------------|----------------|----------------|----------------|--------------|----------------|
| SRS011529.64867  | 855    | Bacteria | Bacteroidetes | Bacteroidia | Bacteroidales  | Prevotellaceae | Paraprevotella |              |                |
| SRS049959.38447  | 872    | Bacteria | Bacteroidetes | Bacteroidia | Bacteroidales  | Prevotellaceae | Prevotella     | copri        | CUO96334.1     |
| SRS018575.34501  | 885    | Bacteria | Bacteroidetes | Bacteroidia | Bacteroidiales | Bacteroidaceae | Bacteroides    | clarus       | WP_009122035.1 |
| SRS050422.73127  | 891    | Bacteria | Bacteroidetes | Bacteroidia | Bacteroidiales | Bacteroidaceae | Bacteroides    | finegoldii   | OKZ23312.1     |
| SRS020869.18805  | 891    | Bacteria | Bacteroidetes | Bacteroidia | Bacteroidiales | Bacteroidaceae | Bacteroides    | intestinalis | WP_007661425.1 |
| SRS011405.14712  | 861    | Bacteria | Bacteroidetes | Bacteroidia | Bacteroidiales | Bacteroidaceae | Bacteroides    | intestinalis | CCY84748.1     |
| SRS015217.11766  | 926    | Bacteria | Bacteroidetes | Bacteroidia | Bacteroidiales | Bacteroidaceae | Bacteroides    | ovatus       | WP_004304963.1 |
| SRS019601.88766  | 840    | Bacteria | Bacteroidetes | Bacteroidia | Bacteroidiales | Bacteroidaceae | Bacteroides    | vulgatus     | WP_011965330.1 |
| SRS012902.13258  | 891    | Bacteria | Bacteroidetes | Bacteroidia | Bacteroidiales | Bacteroidaceae | Bacteroides    |              |                |
| SRS016203.125956 | 891    | Bacteria | Bacteroidetes | Bacteroidia | Bacteroidiales | Bacteroidaceae | Bacteroides    |              |                |
| SRS045713.76924  | 888    | Bacteria | Bacteroidetes | Bacteroidia | Bacteroidiales | Bacteroidaceae | Bacteroides    |              |                |
| SRS048870.28850  | 883    | Bacteria | Bacteroidetes | Bacteroidia | Bacteroidiales | Bacteroidaceae | Bacteroides    |              |                |
| SRS015190.42469  | 871    | Bacteria | Bacteroidetes | Bacteroidia | Bacteroidiales | Bacteroidaceae | Bacteroides    |              |                |
| SRS056259.118375 | 871    | Bacteria | Bacteroidetes | Bacteroidia | Bacteroidiales | Bacteroidaceae | Bacteroides    |              |                |
| SRS019787.27227  | 861    | Bacteria | Bacteroidetes | Bacteroidia | Bacteroidiales | Bacteroidaceae | Bacteroides    |              |                |
| SRS017433.24596  | 858    | Bacteria | Bacteroidetes | Bacteroidia | Bacteroidiales | Bacteroidaceae | Bacteroides    |              |                |
| SRS013476.24854  | 693    | Bacteria | Firmicutes    | Clostridia  | Clostridiales  | Eubacteriaceae | Eubacterium    |              |                |

**Table S2. Bioinformatic analysis of the HMP GUS enzymes identified 18 GUS enzymes with calcium binding sites.**

| HMGCI D          | Length | Kingdom  | Phylum        | Class       | Order          | Family             | Genus            | Species         | NCBI Annotation | NCBI ID        |
|------------------|--------|----------|---------------|-------------|----------------|--------------------|------------------|-----------------|-----------------|----------------|
| SRS052697.50102  | 1427   | Bacteria | Bacteroidetes | Bacteroidia | Bacteroidiales | Bacteroidaceae     | Bacteroides      | eggerthii       | GH2 protein     | WP_017140867.1 |
| SRS022137.24481  | 689    | Bacteria | Bacteroidetes | Bacteroidia | Bacteroidiales | Bacteroidaceae     | Bacteroides      | MSP             | GH2 protein     | WP_007840523.1 |
| SRS055982.32560  | 875    | Bacteria | Bacteroidetes | Bacteroidia | Bacteroidiales | Bacteroidaceae     | Bacteroides      | salyersiae      | GUS/b-gal       | CUM88360.1     |
| SRS024388.29889  | 796    | Bacteria | Bacteroidetes | Bacteroidia | Bacteroidiales | Bacteroidaceae     | Bacteroides      | sartorii        | GH2 protein     | WP_016277419.1 |
| SRS011405.4923   | 1427   | Bacteria | Bacteroidetes | Bacteroidia | Bacteroidiales | Bacteroidaceae     | Bacteroides      | thetaitaomicron | b-gal           | WP_081030062.1 |
| SRS014613.5859   | 1118   | Bacteria | Bacteroidetes | Bacteroidia | Bacteroidiales | Bacteroidaceae     | Bacteroides      | thetaitaomicron | GUS/b-gal       | WP_080973891.1 |
| SRS018133.31535  | 814    | Bacteria | Bacteroidetes | Bacteroidia | Bacteroidiales | Bacteroidaceae     | Bacteroides      | uniformis       | GH2 protein     | WP_044467710.1 |
| SRS017433.149978 | 1429   | Bacteria | Bacteroidetes | Bacteroidia | Bacteroidiales | Bacteroidaceae     | Bacteroides      |                 | b-gal           |                |
| SRS011586.60073  | 826    | Bacteria | Bacteroidetes | Bacteroidia | Bacteroidiales | Porphyromonadaceae | Parabacteroides  | merdae          | GH2 protein     | WP_005639106.1 |
| SRS014923.34218  | 642    | Bacteria | Firmicutes    | Clostridia  | Clostridiales  | Clostridiaceae     | Faecalibacterium | CAG:74          | b-gal           | OLA21514.1     |
| SRS023914.87176  | 647    | Bacteria | Firmicutes    | Clostridia  | Clostridiales  |                    |                  |                 |                 |                |

**Table S3. Bioinformatic analysis of the HMP identified 11 GUS enzymes containing the variable active site tryptophan observed in *BuGUS-3*.**

| HMGC ID          | Length | Kingdom  | Phylum        | Class       | Order          | Family          | Genus       | Species      | NCBI Annotation | NCBI ID      |
|------------------|--------|----------|---------------|-------------|----------------|-----------------|-------------|--------------|-----------------|--------------|
| SRS020869.249001 | 613    | Bacteria | Bacteroidetes |             |                |                 |             |              |                 |              |
| SRS015190.3291   | 603    | Bacteria | Bacteroidetes | Bacteroidia | Bacteroidiales | Bacteroidaceae  | Bacteroides | uniformis    | GUS/b-gal       | CUO58783     |
| SRS017307.68457  | 600    | Bacteria | Bacteroidetes | Bacteroidia | Bacteroidiales | Rikenellaceae   | Alistipes   | senegalensis | GUS             | WP_019151945 |
| SRS015264.145530 | 600    | Bacteria | Bacteroidetes | Bacteroidia | Bacteroidiales | Barnesiellaceae | Coprobacter | secundus     | GUS             | WP_021929483 |
| SRS049995.49420  | 609    | Bacteria | Bacteroidetes | Bacteroidia | Bacteroidiales | Rikenellaceae   | Alistipes   | senegalensis | GUS             | WP_019149660 |
| SRS017701.130646 | 318    | Bacteria | Bacteroidetes |             |                |                 |             |              |                 |              |

**Table S4. Bioinformatics analysis of the HMP identified 6 GUS enzymes containing an N-terminal loop like that observed in *Bu*GUS-1.**

| PrimerName                       | Sequence                                                       |
|----------------------------------|----------------------------------------------------------------|
| <i>Bu</i> GUS-1 Fwd              | TACTTCCAATCCAATGCGTTTCG CACAGCAGGCACCG CAGATTATGAAC            |
| <i>Bu</i> GUS-1 Rev              | TTATCCACTTCCAATGCGCTATTTATAGGCTTCAGTCAGTTCCTTATACCATTTCTG      |
| <i>Bu</i> GUS-3 Fwd              | TACTTCCAATCCAATGCGGTGATCCCGACCGATCGTAAACAGCGTC                 |
| <i>Bu</i> GUS-3 Rev              | TTATCCACTTCCAATGCGCTACTGGCCGCTCACAGAGATCAGCGC                  |
| BMSF Fwd                         | TACTTCCAATCCAATGCGCAGAACCTGATTACCAATGTTTACGGTCGTGACATCC        |
| BMSF Rev                         | TTATCCACTTCCAATGCGCTATTACCGAATTTGTTTTGTAGTACTCACGCATCAGGTA     |
| <i>Bu</i> GUS-1 ΔN-term loop Fwd | GTTGATCCGTTTGGAAAACGGTCGTG GCAAGAAAGTTTACCAGGATAAAACCTATAGTGAT |
| <i>Bu</i> GUS-1 ΔN-term loop Rev | ATCACTATAGGTTTTATCCTGGTAACTTTTCATGCCACGACCGTTTTTGAACGGATCAAC   |
| <i>Bu</i> GUS-2 D341A Fwd        | GTCCGGCTCTGACGGCTGAAATGCATCGTCG                                |
| <i>Bu</i> GUS-2 D341A Rev        | CGACGATGCATTTTCAGCCGTCAGAGCCGGAC                               |
| <i>Bu</i> GUS-2 D367A Fwd        | CACTACCCGCAGGCTGACGCTCTGCTG                                    |
| <i>Bu</i> GUS-2 D367A Rev        | CAGCAGAGCGTCAGCCTGCGGGTAGTG                                    |
| <i>Bu</i> GUS-2 N591A/K593A Fwd  | CTGCGTGATGAAAGCATGCCGCTATTGCCAACGCAGGCCTGGTTTAC                |
| <i>Bu</i> GUS-2 N591A/K593A Rev  | CGTAAACCAGGCTGCGTTGGCAATACGCGGCATGCTTTCATCACGCAG               |

**Table S5. Primer sequences used in this study.**
